# Supplementary material for: Synchronizing 10 Be in two varved lake sediment records to IntCal13 14 C during three grand solar minima
Source: Copernicus journal article supplement (doi:10.5194/cp-14-687-2018), 2018-05-31
Supplement: Supplementary file [file cp-14-687-2018-supplement-title-page.pdf › cp-14-687-2018-supplement-title-page.pdf]

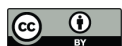

*Supplement of*

## **Synchronizing $^{10}\text{Be}$ in two varved lake sediment records to IntCal13 $^{14}\text{C}$ during three grand solar minima**

**Markus Czymzik et al.**

*Correspondence to:* Markus Czymzik ([markus.czymzik@io-warnemuende.de](mailto:markus.czymzik@io-warnemuende.de))

- [cp-14-687-2018-supplement-title-page.pdf](#)
- [Caption Figure S1.txt](#)
- [Fig. S1.eps](#)

The copyright of individual parts of the supplement might differ from the CC BY 4.0 License.
